# Supplementary material
Source: PubMed Central journal article supplement (PMC4394305)
Supplement: pnas.201503474SI.pdf [file pnas.201503474SI.pdf]

# Supporting Information

Guo et al. 10.1073/pnas.1503474112

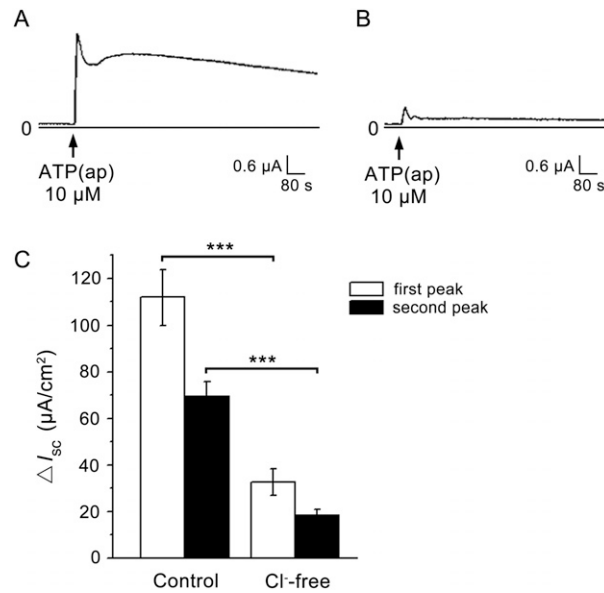

**Fig. S1.** Cl<sup>-</sup>-dependence of the  $I_{sc}$  response to ATP.  $I_{sc}$  recordings obtained from proximal trachea tissues bathed in normal K-H solution (A) and in Cl<sup>-</sup>-free solution (B). (C) A summary of the effects in the different conditions. Data are presented as mean change in  $I_{sc} \pm$  SEM ( $n = 4$ ) and are based on four independent experiments (A–C). \*\*\* $P < 0.001$ .

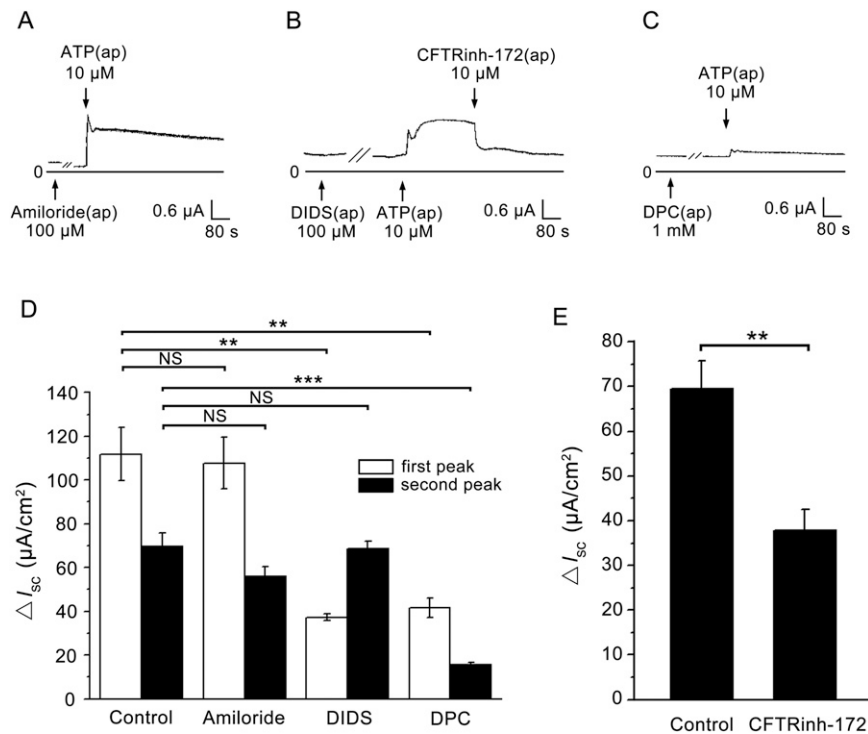

**Fig. S2.** Effects of ENaC and  $Cl^-$  channel blockers on ATP-induced  $I_{sc}$  currents. Addition of 10  $\mu M$  ATP to the apical side (ap) of the proximal trachea tissues caused a rise in  $I_{sc}$  response. This response was not changed by adding 100  $\mu M$  Amiloride (an ENaC blocker) (ap) (A) but was partially inhibited by adding 100  $\mu M$  DIDS (a CaCC blocker) (ap) and 10  $\mu M$  CFTRi-172 (a CFTR blocker) applied to the cells (ap) when the ATP-induced  $I_{sc}$  response stays at the plateau (B) and was almost inhibited by 1 mM DPC (a nonselective  $Cl^-$  channel blocker) (ap) (C). (D) A summary of the effects of Amiloride, DIDS, and DPC on the ATP-induced  $I_{sc}$  response. (E) A summary of the effects of CFTRi-172 on the second phase of ATP-induced  $I_{sc}$  response. Data are presented as mean change in  $I_{sc} \pm SEM$  ( $n = 4$ ) and are based on four independent experiments (A–E). \*\* $P < 0.01$ ; \*\*\* $P < 0.001$ ; NS,  $P > 0.05$ .

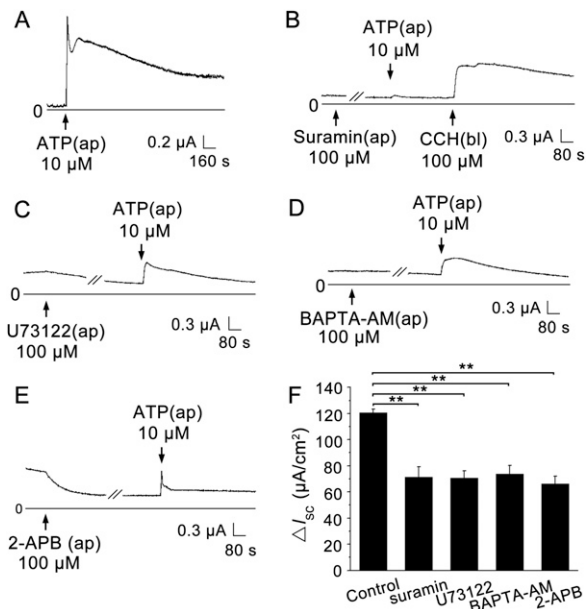

**Fig. S3.** ATP-induced  $I_{sc}$  responses were mediated by the P2Y2-R. Addition of 10  $\mu M$  ATP to the apical side (ap) of the proximal trachea tissues caused a rise in  $I_{sc}$  response (A). The response was found to be partially inhibited after 100  $\mu M$  suramin (a P2-R antagonist) (ap) pretreatment for 15 min; the addition of 100  $\mu M$  Carbachol (CCH, an analog of acetylcholine) to the basolateral side (bl) of cells was done to check the activity of cells (B). The response was also found to be partially inhibited after 100  $\mu M$  U73122 (a PLC activation inhibitor) (ap) (C) or BAPTA-AM (a  $[Ca^{2+}]_i$  chelator) (ap) (D) and/or 2-APB (a IP3 receptor blocker) (ap) (E) pretreatment for 15 min. (F) A summary of the effects of suramin, U73122, BAPTA-AM, and 2-APB. Data are presented as mean change in  $I_{sc} \pm SEM$  ( $n = 4$ ) and are based on four independent experiments. \*\* $P < 0.01$ .

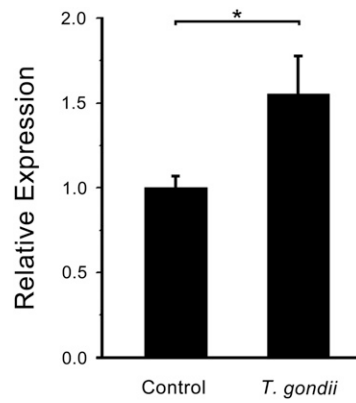

**Fig. S4.** *T. gondii* infection results in increased P2Y2-R expression. Quantitative real-time PCR analysis of mRNA expression of P2Y2-R in mice trachea treated without or with *T. gondii* for 3 d. Absolute values were corrected using beta-actin as a reference gene. Gene expression was reported as the relative variation to unstimulated control tissue mRNA levels. Bars represent means  $\pm$  SEM ( $n = 3$ ) and are based on three independent experiments.  $*P < 0.05$ .
